# Supplementary material for: Development of two species of the Trypanosoma theileri complex in tabanids
Source: PubMed Central journal article supplement (PMC8935851; doi:10.1186/s13071-022-05212-y), 2022-03-21

**Ttha**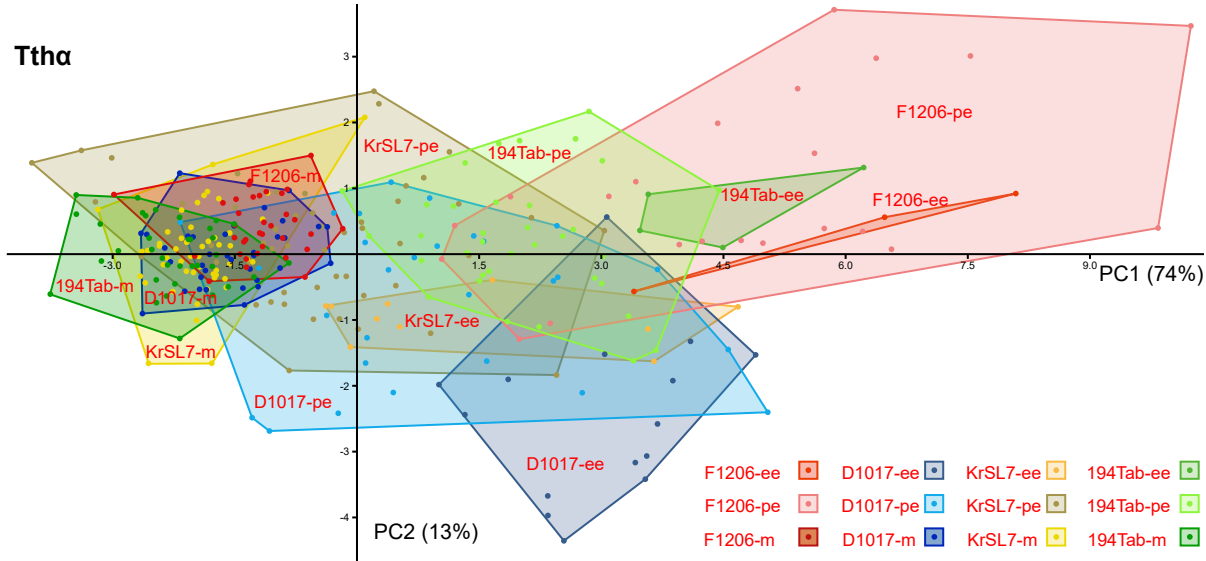**Tth $\beta$** 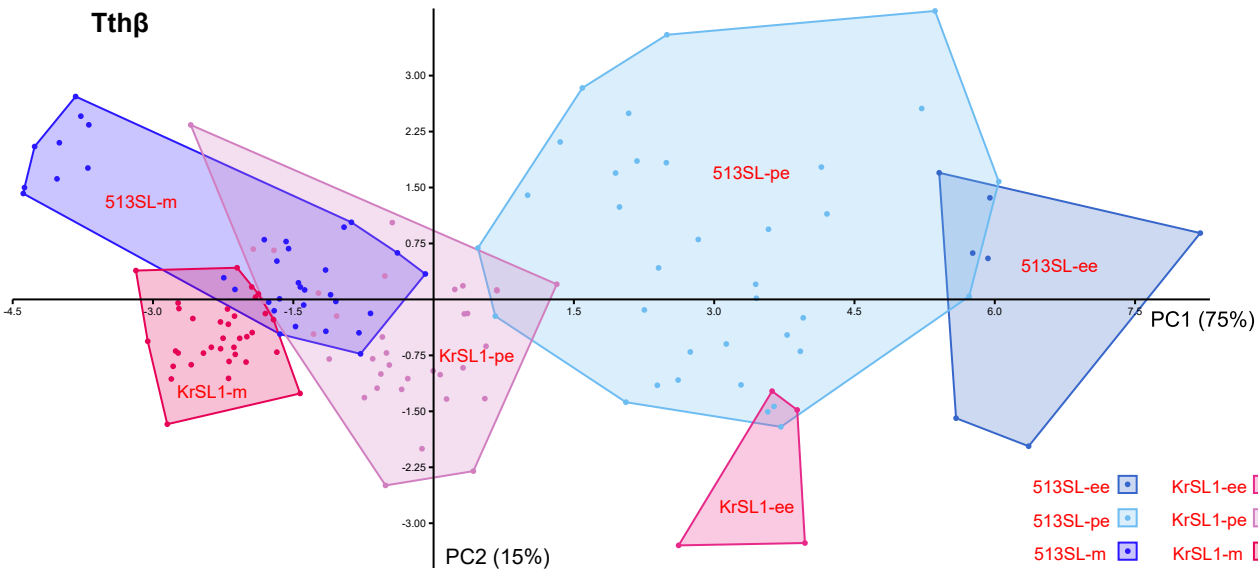

Supplement: 13071_2022_5212_MOESM4_ESM.pdf [file 13071_2022_5212_MOESM4_ESM.pdf]
